# Supplementary material
Source: MDPI journal article supplement (https://www.mdpi.com/2073-4344/12/6/581)
Supplement: s1 [file s1]

# ELECTRONIC SUPPORTING INFORMATION

## Lindqvist versus Keggin-type polyoxometalates as catalysts for effective desulfurization from fuels

Simone Fernandes, Fátima Mirante, Baltazar de Castro, Carlos M. Granadeiro\* and Salette S. Balula\*

*REQUIMTE/LAQV & Department of Chemistry and Biochemistry, Faculty of Sciences, University of Porto, 4169-007 Porto, Portugal*

\*Correspondence: sbalula@fc.up.pt (S.S. Balula); cgranadeiro@fc.up.pt (C.M. Granadeiro)

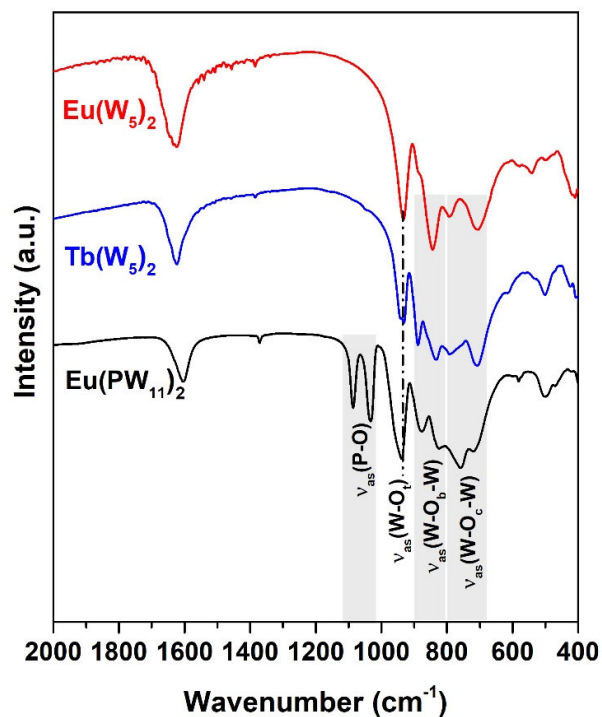

**Figure S1.** FT-IR spectra of  $\text{Eu}(\text{W}_5)_2$ ,  $\text{Tb}(\text{W}_5)_2$  and  $\text{Eu}(\text{PW}_{11})_2$ .

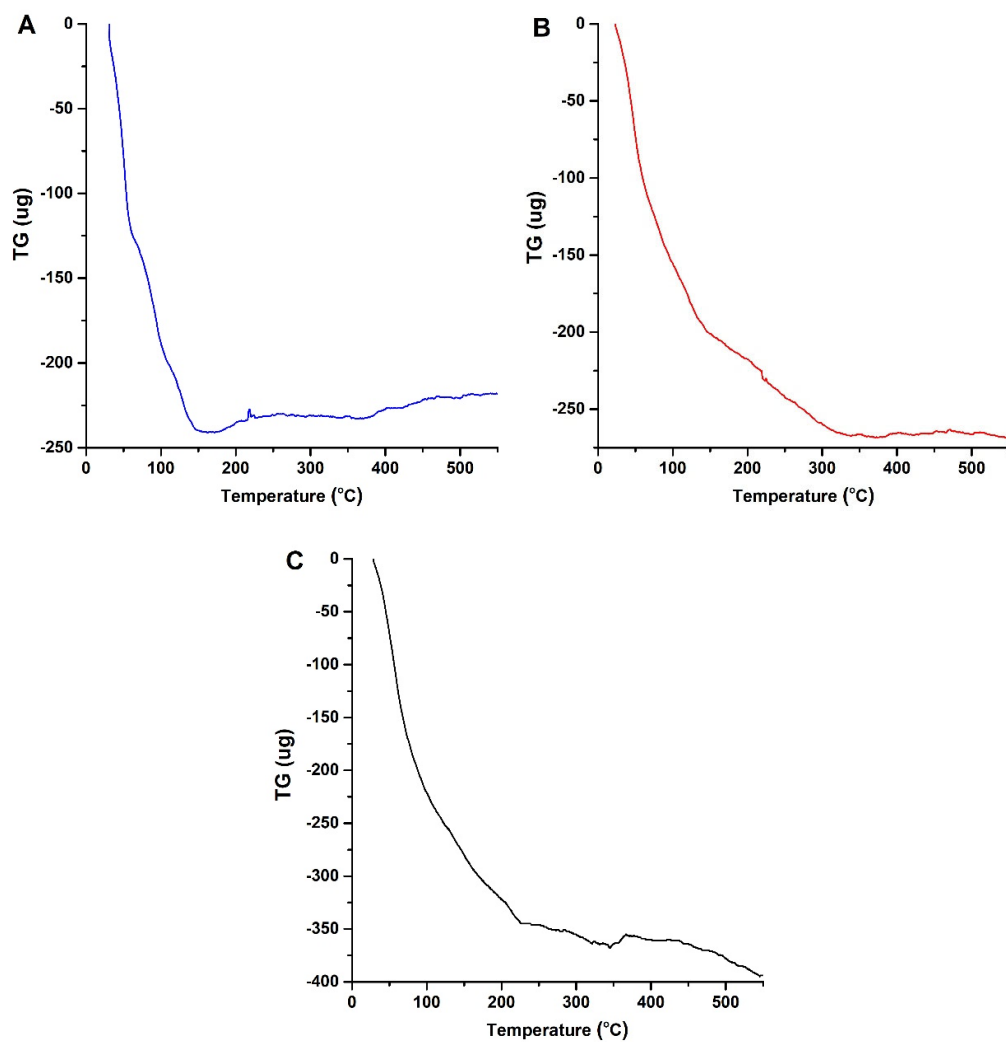

**Figure S2.** TGA curves for (A)  $\text{Eu}(\text{W}_5)_2$ , (B)  $\text{Tb}(\text{W}_5)_2$  and (C)  $\text{Eu}(\text{PW}_{11})_2$ .
